# Supplementary material for: Effect of impurities in different activated carbon materials and their in-depth electrochemical analysis in supercapacitor coin-cell devices with organic electrolyte
Source: Royal Society of Chemistry journal article supplement (doi:10.1039/d4ta09232e), 2025-01-01
Supplement: d4ta09232e1.pdf [file d4ta09232e1.pdf]

## Supplementary Information

### Effect of impurities in different activated carbon materials and their in-depth electrochemical analysis of supercapacitor coin-cell device in organic electrolyte†

Kye-yeol Lee <sup>a</sup>, Il Yeong Jeong <sup>a</sup>, Jeong-Woo Kim <sup>a</sup>, Seungmin Yu <sup>b</sup>, Hye-Min Lee <sup>c</sup>,  
Sivaprakasam Radhakrishnan <sup>d</sup>, Byoung-Suhk Kim <sup>a,b,e\*</sup>

<sup>a</sup> Department of Carbon Composites Convergence Materials Engineering, Jeonbuk National University, 567 Baekje-daero, Deokjin-gu, Jeonju-si, Jeollabuk-do 54896, Republic of Korea

<sup>b</sup> Department of JBNU-KIST Industry-Academia Convergence Research, Jeonbuk National University, 567 Baekje-daero, Deokjin-gu, Jeonju-si, Jeollabuk-do 54896, Republic of Korea.

<sup>c</sup> Research & Development Division, Korea Carbon Industry Promotion Agency, Jeonju 54853, Republic of Korea

<sup>d</sup> Department of Chemistry, School of Science and Humanities, SR University, Warangal 506371, Telangana, India.

<sup>e</sup> Department of Organic Materials and Textile Engineering, Jeonbuk National University, 567 Baekje-daero, Deokjin-gu, Jeonju-si, Jeollabuk-do 54896, Republic of Korea

† Electronic supplementary information (ESI) available. See DOI: <https://doi.org/10.1039/d4ta07531e>

Corresponding Author. E-mail: [kbsuhk@jbnu.ac.kr](mailto:kbsuhk@jbnu.ac.kr) (Byoung-Suhk Kim)

## **Manufacturing process for S-ACs**

### *1. Sample preparation*

The coconut shell, purchased from a local market in Korea, was first crushed after being dried in a convection oven at 80°C. It was then washed several times with DI water to remove unbound dust, soil, and other water-soluble impurities. The washed coconut shell was then placed in a vacuum oven for 24 hrs before carbonization.

### *2. Carbonization*

For the carbonization process, the coconut shell was heated to 700°C under a nitrogen (N<sub>2</sub>) flow at a heating rate of 10°C/min using a lab-scale tube furnace, and held at this temperature for 1 hr before cooling down naturally.

### *3. Steam activation*

3.0 g of the carbonized coconut shell was placed in an alumina boat and heated to 900°C under N<sub>2</sub> flow at a heating rate of 10 °C/min. The gas flow was then switched to steam at a flowing rate of 0.5 mL/min, and the temperature was maintained for 60 min. The sample was then cooled down to below 30 °C under N<sub>2</sub> flow. The obtained activated carbons (ACs) were used without any further purification.

## **ICP-OES analysis**

An Inductively Coupled Plasma Optical Emission Spectrometer (iCAP 7400 Duo, Thermo Fisher Scientific) was utilized to analyze the concentration and elemental compositions of metallic and non-metallic impurities in ACs. To ensure accurate analysis, both Axial and

Radial View Modes were employed. The results were compared with those of Certified Reference Materials (CRMs). For the analysis, samples were pre-treated as follows,

1. Approximately 0.4 g of each sample was placed into a Teflon vessel.
2. 6 mL of concentrated nitric acid solution (~70%) and 0.5 mL of hydrofluoric acid solution (48%) were added to the vessel. The solutions were then treated using a microwave and heated to 250°C for 30 min, followed by cooling down.
3. The pre-treated solution was transferred to a 50 mL conical tube, and the final volume was adjusted to 50 mL with 2% nitric acid solution.

Here, it should be noted that the nebulizer and spray chamber of the ICP-OES were replaced with PTFE materials instead of quartz to prevent potential contamination during the analysis. Each element was measured three times, and the average value was reported.

### ***Nitrogen adsorption-desorption measurements***

To analyze the changes in specific surface areas and pore structure of ACs before and after purification, N<sub>2</sub> adsorption isotherm analysis was conducted using a BELSORP-mini-instrument (MicrotracBEL, Japan). For the analysis, 50 mg of activated carbon samples were pre-treated at 300°C for more than 12 hrs under vacuum to remove adsorbed moisture and air. The specific surface area ( $S_{\text{BET}}$ ) and total pore volume ( $V_{\text{total}}$ ) were calculated using the Brunauer-Emmett-Teller (BET) method.  $V_{\text{total}}$  was determined from measurements of the amount adsorbed at a relative pressure of  $p/p_0 = 0.99$ . The average micropore diameters and micropore volume ( $V_{\text{micro}}$ ) were calculated using the t-plot method.  $V_{\text{micro}}$  was obtained by fitting the linear range in the  $V_{\text{ads}}-t$  curve and calculating the positive intercept. The mesopore volume ( $V_{\text{meso}}$ ) was determined by  $V_{\text{total}} - V_{\text{micro}}$  and the mesopore volume ratio ( $R_{\text{meso}}$ ) was calculated as  $V_{\text{meso}}/V_{\text{total}}$ .

### **Preparation method for activated carbons with added impurities**

1g of YP-50F was immersed in 50 mL of solutions prepared with NaCl, KCl, and FeCl<sub>2</sub> at a concentration of 0.01 wt%. After 1 hr of sonication treatment, the samples were aged at room temperature for 1 day and then dried in a convection oven at 80 °C for more than three days.

**Table S1.** Impurity elemental compositions in various ACs determined by ICP-OES.

| ACs    | Solution | Methodology | Elemental content analyzed by ICP-OES (ppm) |     |      |     |      |     |     |     |     |      |     |     |     |     |     |     |      |       |
|--------|----------|-------------|---------------------------------------------|-----|------|-----|------|-----|-----|-----|-----|------|-----|-----|-----|-----|-----|-----|------|-------|
|        |          |             | Na                                          | Mg  | Al   | P   | K    | Ca  | Ti  | Cr  | Mn  | Fe   | Co  | Ni  | Cu  | Sr  | Sn  | Ba  | Si   | Total |
| YP-50F | None     |             | 143                                         | 91  | 78   | 181 | N.D  | 133 | 80  | 58  | 59  | 70   | 48  | 49  | 78  | 82  | N.D | 77  | 476  | 1703  |
|        | None     |             | 1115                                        | 329 | 4128 | 480 | 9488 | 494 | 611 | 33  | 32  | 2114 | N.D | 18  | 31  | 29  | 8   | 46  | 7405 | 26361 |
| S-ACs  | DI-water | 1 time      | 248                                         | 212 | 4012 | 344 | 2015 | 454 | 589 | 23  | 31  | 2012 | N.D | 12  | 21  | 23  | 4   | 21  | 6808 | 16829 |
|        |          | 5 times     | 73                                          | 211 | 3871 | 312 | 898  | 463 | 604 | 24  | 42  | 1988 | N.D | 4   | 17  | 12  | 3   | 41  | 6754 | 15317 |
|        |          | 10 times    | 11                                          | 198 | 3912 | 310 | 3    | 433 | 585 | 21  | 28  | 1953 | N.D | 6   | 18  | 21  | N.D | 34  | 6312 | 13845 |
|        | HCl      | 0.01 mol    | 145                                         | N.D | 878  | 278 | 1213 | 78  | 142 | N.D | N.D | 332  | N.D | N.D | N.D | N.D | N.D | 24  | 1545 | 4635  |
|        |          | 0.03 mol    | 235                                         | N.D | 1045 | 268 | 1101 | 76  | 121 | N.D | 12  | 478  | N.D | N.D | N.D | N.D | N.D | 32  | 1787 | 5155  |
|        |          | 0.05 mol    | 212                                         | N.D | 1021 | 324 | 1227 | 108 | 131 | N.D | 7   | 499  | N.D | N.D | 7   | N.D | 2   | 12  | 2145 | 5695  |
|        |          | 0.07 mol    | 224                                         | N.D | 1785 | 279 | 1354 | 145 | 137 | 21  | N.D | 875  | N.D | 1   | N.D | N.D | N.D | 33  | 2738 | 7592  |
|        |          | 0.1 mol     | 212                                         | N.D | 1978 | 389 | 1412 | 212 | 188 | 17  | N.D | 1214 | N.D | N.D | 14  | N.D | N.D | 18  | 3065 | 8719  |
|        | NaOH     | 0.01 mol    | 412                                         | 265 | 2412 | 54  | 1743 | 304 | 598 | N.D | 34  | 575  | N.D | N.D | N.D | N.D | N.D | N.D | 971  | 7368  |
|        |          | 0.03 mol    | 500                                         | 243 | 2986 | 21  | 1691 | 302 | 457 | N.D | 31  | 899  | N.D | N.D | 8   | N.D | N.D | N.D | 932  | 8070  |
|        |          | 0.05 mol    | 798                                         | 311 | 3001 | 78  | 1729 | 287 | 578 | N.D | 45  | 876  | N.D | N.D | N.D | N.D | N.D | N.D | 1211 | 8914  |
|        |          | 0.07 mol    | 1234                                        | 214 | 3012 | 45  | 1842 | 278 | 512 | N.D | 14  | 917  | N.D | 3   | N.D | N.D | N.D | N.D | 1787 | 9858  |
|        |          | 0.1 mol     | 1543                                        | 308 | 2945 | 61  | 1994 | 239 | 567 | N.D | 12  | 925  | N.D | N.D | N.D | N.D | N.D | N.D | 2511 | 11105 |
|        | NaOH+HCl | 0.01 mol    | 111                                         | N.D | 433  | 79  | 128  | 25  | 144 | N.D | N.D | 229  | N.D | N.D | 14  | N.D | 101 | N.D | 823  | 2087  |
|        |          | 0.1 mol     | 310                                         | 144 | 1873 | 50  | 776  | 167 | 145 | 88  | 36  | 743  | N.D | 32  | 79  | 43  | 37  | 44  | 1586 | 6153  |

**N.D : Not Detected.**

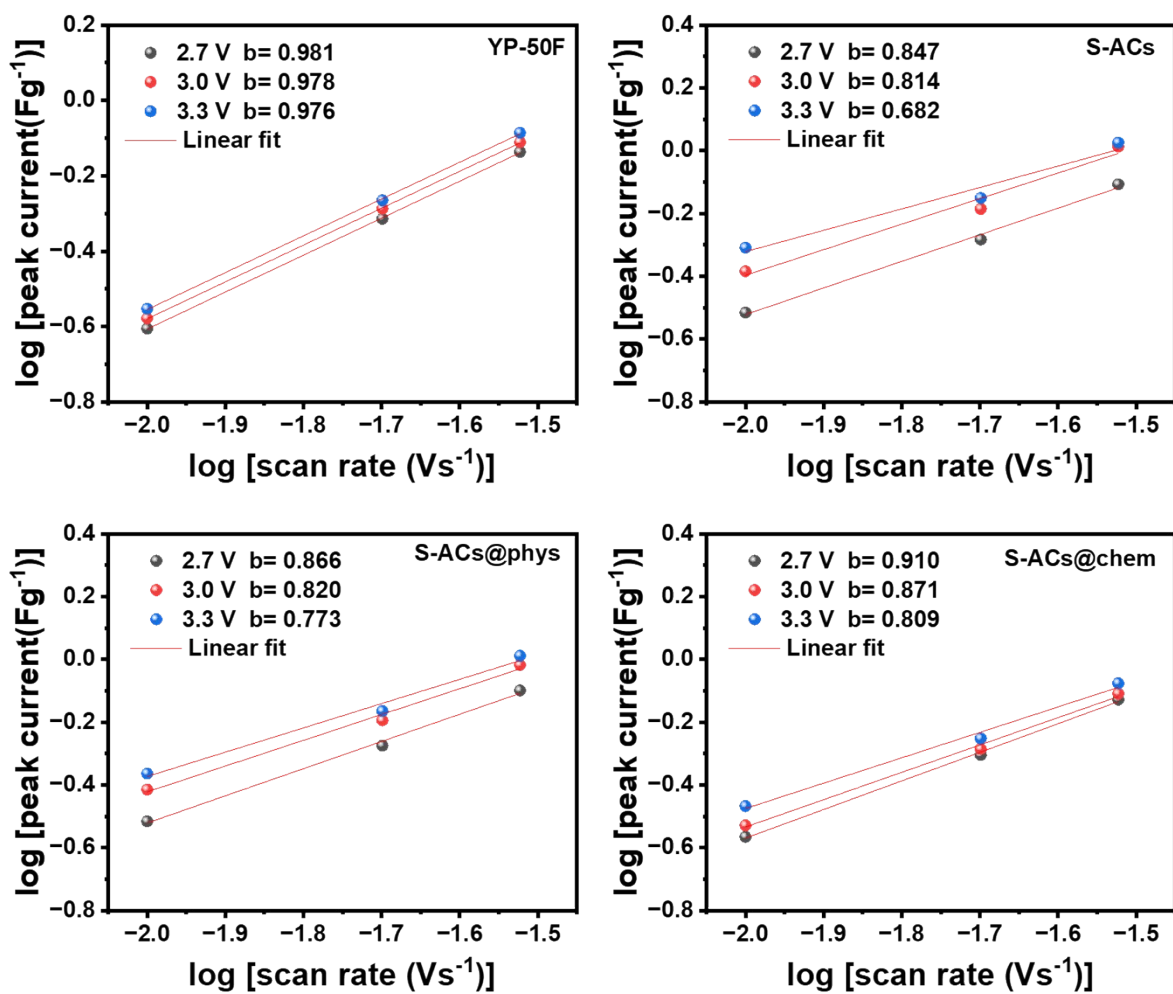

Fig. S1. logarithmic relationship between anodic scan rates and peak current ACs at different potentials.

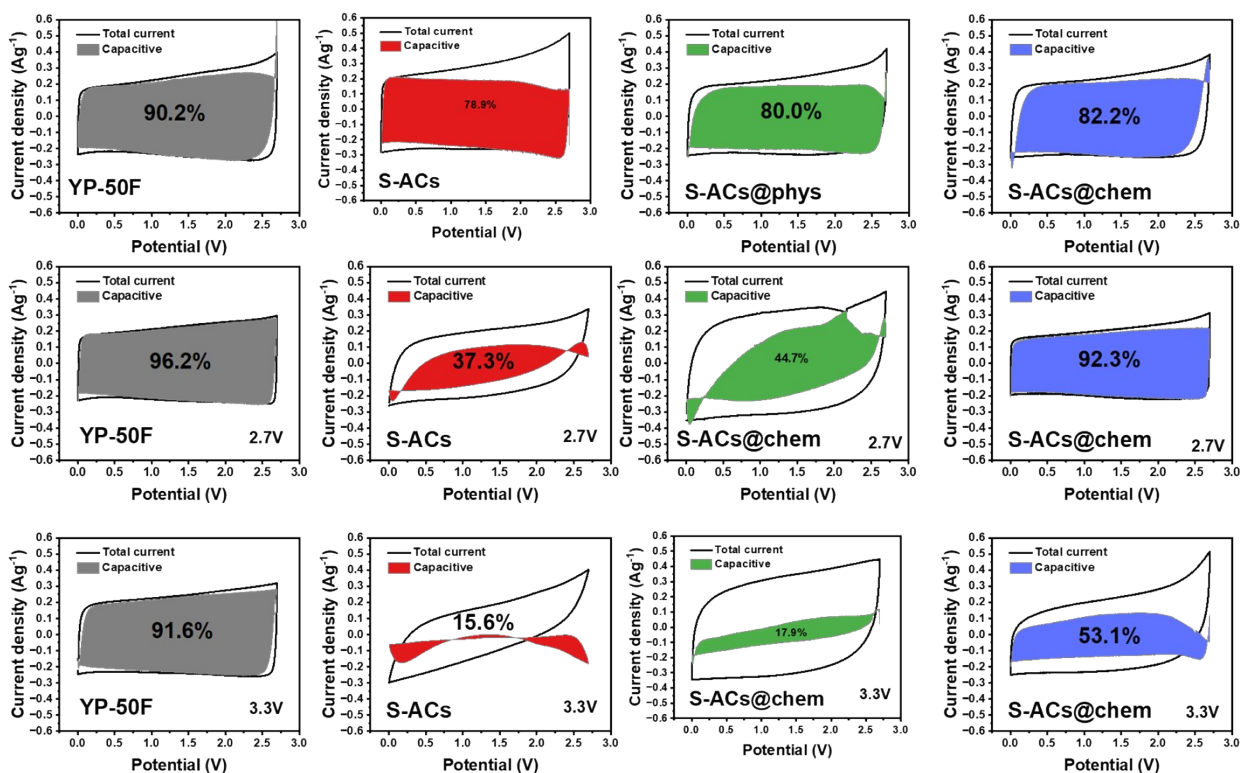

**Fig. S2.** The deconvolution of CV curves using Dunn's method: before and after floating tests at 2.7V and 3.3V.

**Table S2.** Textural properties of various ACs.

| ACs                                       | YP-50F |        | S-ACs  |        | S-ACs@phys |        | S-ACs@chem |        |
|-------------------------------------------|--------|--------|--------|--------|------------|--------|------------|--------|
| Electrode                                 | +      | -      | +      | -      | +          | -      | +          | -      |
| $S_{\text{BETn}}^a$ (m <sup>2</sup> /g)   | 1254.7 | 1374.7 | 229.4  | 348.6  | 531.2      | 590.9  | 698.5      | 801.4  |
| $V_{\text{Total}}^b$ (cm <sup>3</sup> /g) | 0.6412 | 0.7575 | 0.1104 | 0.191  | 0.2461     | 0.3169 | 0.2885     | 0.3298 |
| $V_{\text{micro}}^c$ (cm <sup>3</sup> /g) | 0.4789 | 0.5410 | 0.092  | 0.146  | 0.2041     | 0.2198 | 0.2734     | 0.3108 |
| $V_{\text{meso}}^d$ (cm <sup>3</sup> /g)  | 0.1623 | 0.2165 | 0.0184 | 0.0450 | 0.0420     | 0.0971 | 0.0151     | 0.0190 |
| $R_{\text{meso}}^e$ (%)                   | 23.4   | 28.6   | 16.7   | 13.6   | 17.1       | 30.6   | 5.2        | 5.8    |
| Micropore diameter <sup>f</sup>           | 0.7134 | 0.7312 | 0.7384 | 0.6564 | 0.7023     | 0.6448 | 0.678      | 0.6304 |

<sup>a</sup> BET surface area.

<sup>d</sup> Mesopore volume:  $V_{\text{total}} - V_{\text{micro}}$ .

<sup>b</sup> Total pore volume: the amount adsorbed  $P/P_0 = 0.99$ .

<sup>e</sup> Mesopore volume percentage:  $V_{\text{meso}}/V_{\text{total}} \times 100$ .

<sup>c</sup> Micropore volume: t-plot.

<sup>f</sup> Micropore diameter: t-plot



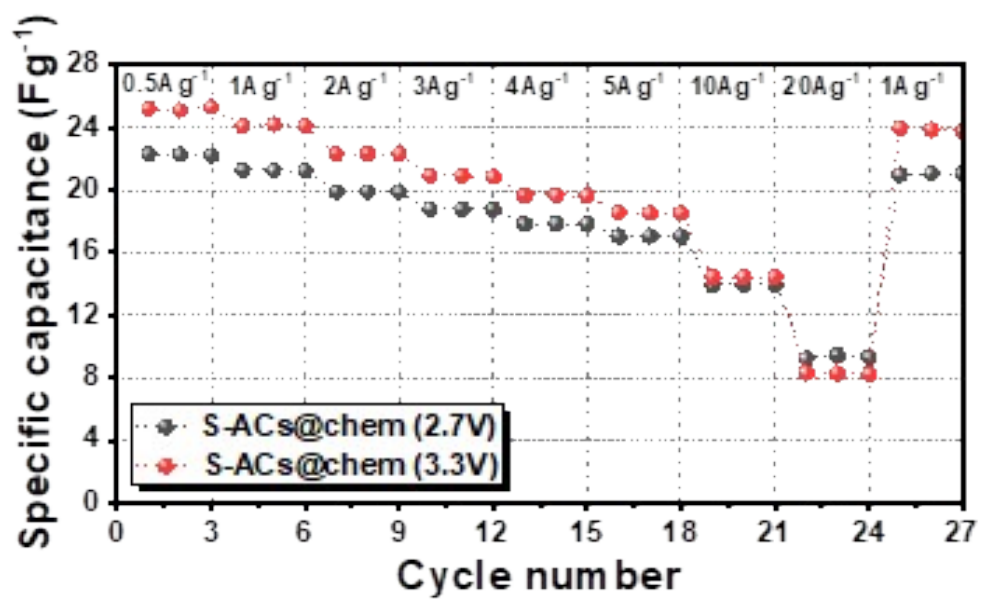

**Fig. S3.** Gravimetric capacitance of S-ACs@chem at different cell voltages (2.7 V and 3.3 V).

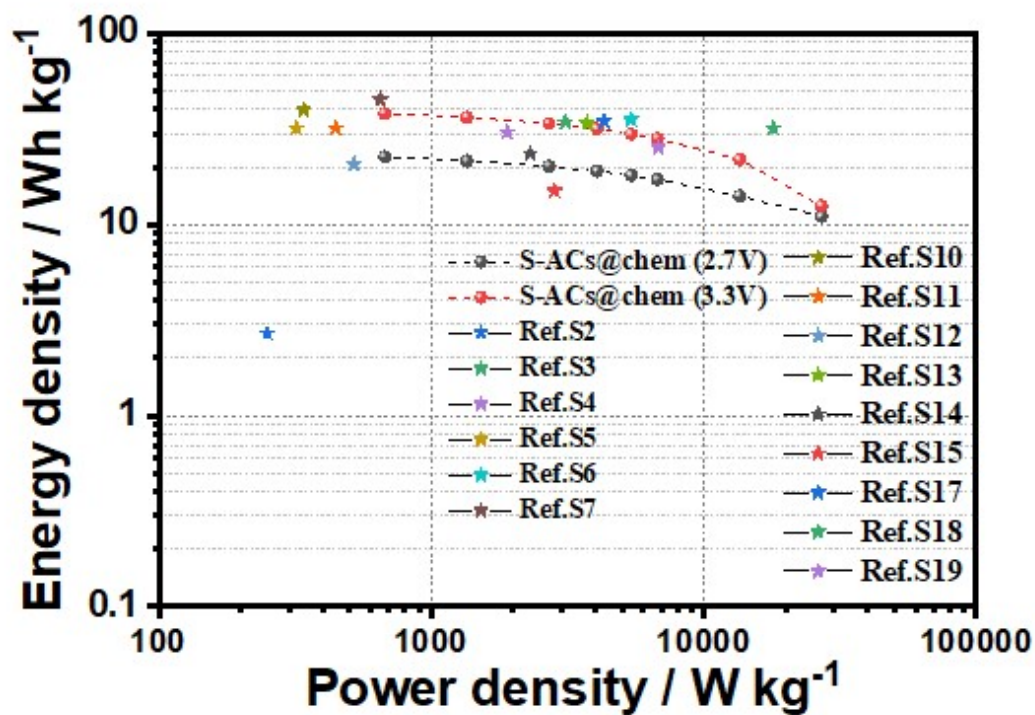

**Fig. S4.** Ragone plot of S-ACs@chem at different cell voltages (2.7 V and 3.3 V), compared with previous studies.

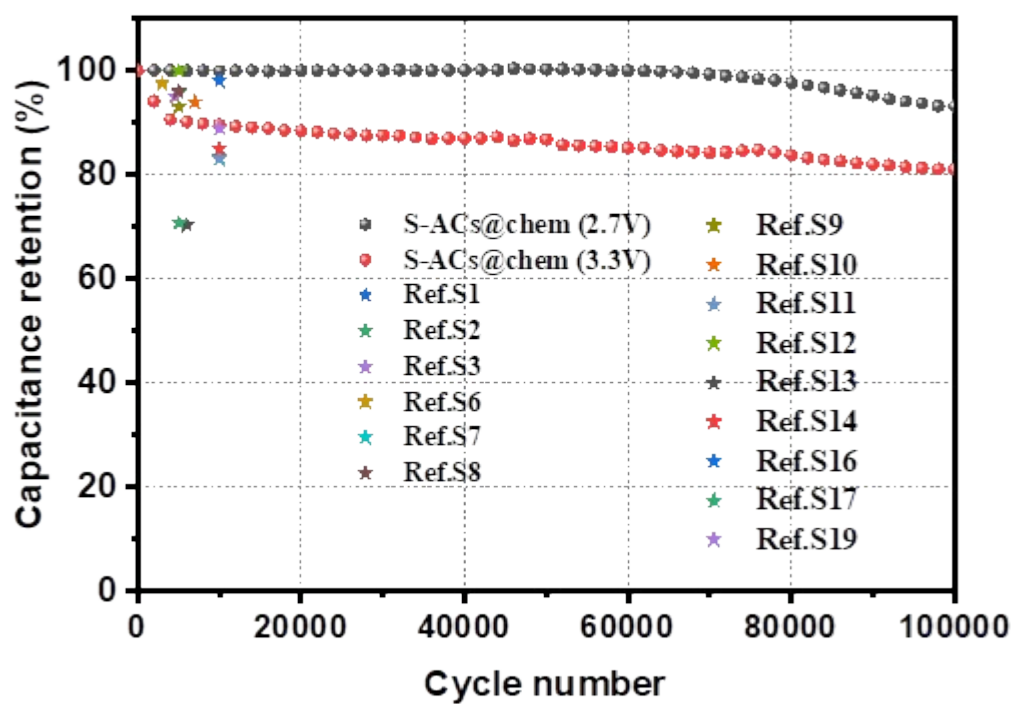

**Fig. S5.** Cycle stability of S-ACs@chem at different cell voltages (2.7 V and 3.3 V), compared with previous studies.

**Table S3.** Comparison of electrochemical performance of S-ACs@chem with previous studies.

| Precursor                             | Activator                                            | S <sub>BET</sub><br>(m <sup>2</sup> g) | Electrolyte                         | Cell<br>voltage(V) | C <sub>sp</sub> (Fg <sup>-1</sup> )<br>@ Current<br>density (Ag <sup>-1</sup> ) | ED<br>(Wh/kg) | PD<br>(W/kg) | Cycle number @<br>Cycling rate (Ag <sup>-1</sup> ) | Reten<br>tion<br>(%) | Ref.         |
|---------------------------------------|------------------------------------------------------|----------------------------------------|-------------------------------------|--------------------|---------------------------------------------------------------------------------|---------------|--------------|----------------------------------------------------|----------------------|--------------|
| tree bark                             | KOH                                                  | 1018                                   | 1 M Na <sub>2</sub> SO <sub>4</sub> | 0.6                | 114 @ 0.3                                                                       | -             | -            | 5000 @ 5                                           | 100                  | S1           |
| Pistachio<br>shell                    | Na <sub>2</sub> S <sub>2</sub> O <sub>3</sub>        | 775                                    | 1M KOH                              | 1                  | 88 @ 0.5                                                                        | 2.7           | 250          | 5000 @ 10                                          | 95.8                 | S2           |
| Silkworm<br>cocoon                    | KOH                                                  | 3386                                   | 1 M<br>TEABF <sub>4</sub> in<br>ACN | 2.5                | 156.1 @ 5                                                                       | 34.4          | 3100         | 4500 @ 20                                          | 95                   | S3           |
| Argan shells                          | KOH                                                  | 2251                                   | 1 M<br>TEABF <sub>4</sub> in<br>ACN | 2.5                | ca.36                                                                           | 30.5          | 1900         | -                                                  | -                    | S3           |
| Durian husk                           | KOH                                                  | 2488                                   | 1 M<br>TEABF <sub>4</sub> in<br>ACN | 2.5                | 145                                                                             | 32            | 320          | -                                                  | -                    | S5           |
| Samanea<br>saman leaves               | KOH                                                  | 2930                                   | 1 M<br>TEABF <sub>4</sub> in<br>ACN | 2.5                | 179.2                                                                           | 35.3          | 5410         | 3000 @ 5                                           | 97.5                 | S6           |
| Potatoes                              | KOH                                                  | 1381                                   | BMIMBF <sub>4</sub><br>in ACN       | 2.6                | 182 @ 0.5                                                                       | 45.1          | 650          | 10000 @ 5                                          | 83.3                 | S7           |
| Pollens from<br>lotus                 | KOH                                                  | 3037                                   | 1 M<br>TEABF <sub>4</sub> in<br>ACN | 2.7                | 185 @ 1                                                                         | 46            | -            | 5000 @ 1                                           | 96                   | S8           |
| Sawdust                               | KOH                                                  | 2924                                   | 1 M<br>TEABF <sub>4</sub> in<br>ACN | 2.5                | 150 @<br>0.25                                                                   | 44            | -            | 5000 @ 0.5                                         | 93                   | S9           |
| Pollen pine                           | KOH                                                  | 2318                                   | 1 M<br>TEABF <sub>4</sub> in<br>ACN | 2.5                | 147 @ 0.5                                                                       | 39.7          | 340          | 7000 @ 1                                           | 94                   | S10          |
| Pear                                  | KOH                                                  | 2332                                   | 1 M<br>TEABF <sub>4</sub> in<br>ACN | 2.5                | 126 @ 2                                                                         | 32            | 445          | 10000 @ 2                                          | 83                   | S11          |
| Potato                                | Self<br>activation                                   | 2201                                   | 1 M<br>TEABF <sub>4</sub> in<br>ACN | 2.1                | 34.0 @ 0.5                                                                      | 20.8          | 520          | 5000 @ 5                                           | ~10<br>0             | S12          |
| Spent coffee<br>grounds               | CO <sub>2</sub>                                      | 2497                                   | 1.5 M<br>LiClO <sub>4</sub> /PC     | 2.5                | 222.4 @<br>0.5                                                                  | 33.8          | 3730         | 6000 @ 1                                           | 70.3                 | S13          |
| Bamboo<br>bagasse                     | ZnCl <sub>2</sub><br>+CO <sub>2</sub>                | -                                      | 1 M<br>TEABF <sub>4</sub> in<br>ACN | 2.7                | 153 @ 1                                                                         | 23.5          | 2300         | 10000                                              | 85                   | S14          |
| Corncob<br>residue                    | Steam                                                | 1210                                   | 1M TEABF <sub>4</sub><br>in ACN     | -                  | 120 @ 1                                                                         | 15            | 2827         | -                                                  | -                    | S15          |
| Soybean<br>waste                      | Steam                                                | 1321                                   | 1M Na <sub>2</sub> SO <sub>4</sub>  | 1                  | 151.5 @ 1                                                                       | -             | -            | 10000                                              | 98                   | S16          |
| Plane tree<br>bark                    | ZnO                                                  | 1511                                   | 1 M<br>TEABF <sub>4</sub> in<br>ACN | 3.0                | 115 @ 20                                                                        | 34.6          | 4300         | 5000 @ 2                                           | 70.8                 | S17          |
| Eucalyptus<br>sawdust                 | KCl/Na <sub>2</sub><br>S <sub>2</sub> O <sub>3</sub> | 2590                                   | 1 M<br>TEABF <sub>4</sub> in<br>ACN | 2.7                | 140 @ 5                                                                         | 32            | 18000        | -                                                  | -                    | S18          |
| Lignin                                | K <sub>2</sub> CO <sub>3</sub>                       | 1529                                   | 1 M<br>TEABF <sub>4</sub> in<br>ACN | 2.5                | 140 @<br>0.05                                                                   | 25.3          | 6800         | 10000 @ 5                                          | 89                   | S19          |
| Coconut<br>shell<br>(S-ACs @<br>chem) | Steam                                                | 1341                                   | 1 M<br>DMPBF <sub>4</sub> in<br>ACN | 2.7                | 22.2 @ 0.5                                                                      | 22.6<br>9.5   | 675<br>27000 | 100000 @ 5                                         | 93                   | This<br>work |
|                                       |                                                      |                                        |                                     | 3.3                | 25.2 @ 0.5                                                                      | 38.1          | 675          | 53896 @ 5                                          | 80                   |              |

**Table S4.** Impurity elemental compositions in YP-50F and impurity-added YP-50F determined by ICP-OES

| Commercial ACs             | Elemental content analyzed by ICP-OES (ppm) |    |    |     |       |     |    |    |    |      |    |    |    |    |    |    |     |       |
|----------------------------|---------------------------------------------|----|----|-----|-------|-----|----|----|----|------|----|----|----|----|----|----|-----|-------|
|                            | Na                                          | Mg | Al | P   | K     | Ca  | Ti | Cr | Mn | Fe   | Co | Ni | Cu | Sr | Sn | Ba | Si  | Total |
| YP-50F                     | 143                                         | 91 | 78 | 181 | 0     | 133 | 80 | 58 | 59 | 70   | 48 | 49 | 78 | 82 | 0  | 77 | 476 | 1703  |
| YP-50F + NaCl              | 11778                                       | 14 | 99 | 20  | 348   | 127 | 0  | 0  | 1  | 4    | 0  | 1  | 25 | 0  | 0  | 4  | 848 | 13269 |
| YP-50F + KCl               | 167                                         | 24 | 57 | 23  | 12810 | 128 | 0  | 1  | 0  | 689  | 0  | 12 | 37 | 0  | 0  | 2  | 732 | 14682 |
| YP-50F + FeCl <sub>2</sub> | 122                                         | 87 | 21 | 78  | 121   | 145 | 0  | 51 | 4  | 9312 | 11 | 0  | 54 | 54 | 0  | 11 | 675 | 10746 |

## References

1. D. Momodu, M. Madito, F. Barzegar, A. Bello, A. Khaleed, O. Olaniyan, J. Dangbegnon, N. Manyala, *J. Solid State Electrochem.*, 2017, **21**, 859.
2. O. C. Altinci, M. Demir, *Energy & Fuels*, 2020, **34**, 7658-7665.
3. J. Sun, J. Niu, M. Liu, J. Ji, M. Dou, F. Wang, *Appl. Surf. Sci.*, 2018, **427**, 807-813.
4. O. Boujibar, A. Ghosh, O. Achak, T. Chafik, F. Ghamouss, *J. Energy Storage*, 2019, **26**, 100958.
5. P. Ukkakimapan, V. Sattayarut, T. Wanchaem, V. Yordsri, M. Phonyiem, S. Ichikawa, M. Obata, M. Fujishige, K. Takeuchi, W. Wongwiriyapan, M. Endo, *Diam. Relat. Mater.*, 2020, **107**, 107906.
6. V. Sattayarut, T. Wanchaem, P. Ukkakimapan, V. Yordsri, P. Dulyaseree, M. Phonyiem, M. Obata, M. Fujishige, K. Takeuchi, W. Wongwiriyapan, M. Endo, *RSC Adv.*, 2019, **9**, 21724-21732.
7. C. Lu, X.-Z. Qian, H.-Y. Zhu, Y.-X. Hu, Y.-S. Zhang, B.-M. Zhang, L.-B. Kong, M.-C. Liu, *Mater. Res. Express*, 2019, **6**, 115615.
8. L. Zhang, F. Zhang, X. Yang, K. Leng, Y. Huang, Y. Chen, *Small*, 2013, **9**, 1342-1347.
9. O. E. Eleri, K. U. Azuatalam, M. W. Minde, A. M. Trindade, N. Muthuswamy, F. Lou, Z. Yu, *Electrochim. Acta*, 2020, **362**, 137152.
10. Y. Myung, S. Jung, T. T. Tung, K. M. Tripathi, T. Kim, *ACS Sustain. Chem. Eng.*, 2019, **7**, 3772-3782.
11. W. Fan, H. Zhang, H. Wang, X. Zhao, S. Sun, J. Shi, M. Huang, W. Liu, Y. Zheng, P. Li, *RSC Adv.*, 2019, **9**, 32382-32394.
12. A. Wang, K. Sun, R. Xu, Y. Sun, J. Jiang, *J. Clean. Prod.*, 2021, **283**, 125385.
13. T.-H. Hsieh, H.-L. Wang, G.-T. Yu, G.-M. Huang, J.-H. Lin, *J. Environ. Chem. Eng.*, 2021, **9**, 106418.
14. S. Sundari Gunasekaran, R. Subashchandra Bose, K. Raman, *Orient. J. Chem.*, 2019, **35**, 302-307.
15. W.-H. Qu, Y.-Y. Xu, A.-H. Lu, X.-Q. Zhang, W.-C. Li, *Bioresource Technology*, 2015, **189**, 285-291.
16. Wei Sun, Yan Xiao, Qingyuan Ren, Fuqian Yang, *Journal of Energy Storage*, 2020, **27**, 101070,
17. F. Yu, Z. Ye, W. Chen, Q. Wang, H. Wang, H. Zhang, C. Peng, [Journal and year not provided] Plane tree bark-derived mesopore-dominant hierarchical carbon for high-voltage supercapacitors
18. M. Sevilla, N. Diez, G. A. Ferrero, A. B. Fuertes, *Energy Storage Mater.*, 2019, **18**, 356-365.
19. Y. Zhang, B. Yu, J. Zhang, X. Ding, J. Zeng, M. Chen, C. Wang, *ChemElectroChem*, 2018, **5**, 2142-2149.
